# Supplementary material
Source: PubMed Central journal article supplement (PMC6933514)
Supplement: NIHMS1063506-supplement-Supplement.pdf [file NIHMS1063506-supplement-Supplement.pdf]

**Supplementary Table 1. Measurements of the dorsal-ventral distribution of Sox10-positive migratory neural crest cells upon  $\alpha$ N-catenin knock-down.**

| <u><math>\alpha</math>N-catenin MO</u> | <u>CL side</u> |
|----------------------------------------|----------------|
| 508                                    | 420            |
| 456                                    | 318            |
| 350                                    | 268            |
| 568                                    | 452            |
| 568                                    | 534            |
| 484                                    | 426            |
| 404                                    | 456            |
| 528                                    | 458            |
| 482                                    | 350            |
| 400                                    | 296            |
| 430                                    | 376            |
| 702                                    | 652            |
| 594                                    | 414            |
| 476                                    | 440            |
| 546                                    | 452            |
| 524                                    | 498            |
| 406                                    | 342            |
| 819                                    | 570            |
| 786                                    | 744            |
| 681                                    | 456            |
| 666                                    | 570            |
| 717                                    | 597            |

Dorsal-ventral measurements (made in Adobe Photoshop) of the Sox10-positive migratory neural crest cell domain in at least 5 serial sections from three embryos are presented. CL, contralateral side of the section.

**Supplementary Table 2. Measurements of the area occupied by HNK-1-positive migratory neural crest cells upon  $\alpha$ N-catenin knock-down.**

| HH13-14 embryos (3 total)              |                | HH15-17 embryos (4 total)              |                |
|----------------------------------------|----------------|----------------------------------------|----------------|
| <u><math>\alpha</math>N-catenin MO</u> | <u>CL side</u> | <u><math>\alpha</math>N-catenin MO</u> | <u>CL side</u> |
| 43062                                  | 34089          | 160051                                 | 84131          |
| 70355                                  | 37574          | 136989                                 | 74782          |
| 62925                                  | 41464          | 152562                                 | 92086          |
| 80310                                  | 40086          | 150470                                 | 113172         |
| 72086                                  | 21370.5        | 115160                                 | 98598          |
| 70968.5                                | 54082          | 28016                                  | 20586          |
| 60004                                  | 33347          | 14862                                  | 13528          |
| 47349                                  | 39258          | 225920                                 | 213716         |
| 45181                                  | 45984          | 293177                                 | 247250         |
| 46050                                  | 51141          | 247349                                 | 217623         |
| 61447                                  | 66602          | 265956                                 | 244507         |
| 55250                                  | 43423          | 228321                                 | 257482         |
| 45092                                  | 20946          | 272424                                 | 278526         |
| 34210                                  | 17637          | 296782                                 | 281288         |
| 31044                                  | 9914           | 253980                                 | 153876         |
| 20308                                  | 15033          | 263417                                 | 184634         |
| 38275                                  | 20638          | 239379                                 | 176892         |
| 91562.5                                | 49204          | 286970                                 | 237069         |
|                                        |                | 314254                                 | 229986         |
|                                        |                | 295915                                 | 269070         |
|                                        |                | 269421                                 | 269319         |
|                                        |                | 202514                                 | 116331         |
|                                        |                | 242406                                 | 75882          |
|                                        |                | 263195                                 | 138278         |
|                                        |                | 238589                                 | 89209          |
|                                        |                | 115255                                 | 73793          |

Area measurements (made in Adobe Photoshop) of the HNK-1-positive migratory neural crest cell domain in at least 5 serial sections are presented. CL, contralateral side of the section.

**Supplementary Table 3. Measurements of the dorsal-ventral distribution of Sox10-positive migratory neural crest cells upon  $\alpha$ N-catenin overexpression.**

| <u>pCIG-<math>\alpha</math>N-catenin</u> | <u>CL side</u> |
|------------------------------------------|----------------|
| 182                                      | 316            |
| 236                                      | 494            |
| 230                                      | 470            |
| 320                                      | 484            |
| 366                                      | 562            |
| 484                                      | 750            |
| 318                                      | 464            |
| 364                                      | 610            |
| 364                                      | 566            |
| 350                                      | 574            |
| 608                                      | 590            |
| 738                                      | 956            |
| 1032                                     | 1076           |
| 968                                      | 840            |
| 958                                      | 1042           |
| 416                                      | 480            |
| 504                                      | 800            |
| 646                                      | 736            |
| 464                                      | 672            |
| 646                                      | 946            |
| 666                                      | 872            |
| 614                                      | 808            |

Dorsal-ventral measurements (made in Adobe Photoshop) of the Sox10-positive migratory neural crest cell domain in at least 5 serial sections from three embryos are presented. CL, contralateral side of the section.

**Supplementary Table 4. Measurements of the HNK-1-positive migratory neural crest cell domain upon  $\alpha$ N-catenin overexpression.**

| HH13-14 embryos (4 total)                |                | HH15-17 embryos (4 total)                |                |
|------------------------------------------|----------------|------------------------------------------|----------------|
| <u>pCIG-<math>\alpha</math>N-catenin</u> | <u>CL side</u> | <u>pCIG-<math>\alpha</math>N-catenin</u> | <u>CL side</u> |
| 24666                                    | 41398          | 129627.5                                 | 108919         |
| 32251                                    | 60422          | 64992                                    | 124034         |
| 35484                                    | 50273          | 94408                                    | 108052         |
| 41171                                    | 68979          | 140118                                   | 183003         |
| 46998                                    | 81793          | 154869                                   | 298285         |
| 43858                                    | 98346          | 164967                                   | 220421         |
| 23055                                    | 36617          | 189121                                   | 258552         |
| 14873                                    | 27833          | 319995                                   | 332737         |
| 16242                                    | 30059          | 204698                                   | 288413         |
| 15387                                    | 28908          | 191999                                   | 285659         |
| 14573                                    | 25573          | 129364                                   | 227139         |
| 15345                                    | 14298          | 144895                                   | 237976         |
| 37949                                    | 49978          | 255142                                   | 212882         |
| 27054                                    | 33540          | 174642.5                                 | 172864         |
| 34000                                    | 36769          | 87083                                    | 90645          |
| 38344                                    | 44211          | 96273                                    | 77914          |
| 42103                                    | 54187          | 83131                                    | 78734          |
| 33450                                    | 44749          | 91645                                    | 214235         |
| 43074                                    | 50641          | 115936                                   | 166401         |
| 43173                                    | 55918          | 208895                                   | 263745         |
| 40424                                    | 62457          | 226598                                   | 271928         |
|                                          |                | 225854                                   | 233946         |
|                                          |                | 177719                                   | 242186         |
|                                          |                | 177721                                   | 236744         |
|                                          |                | 128075                                   | 141254         |
|                                          |                | 128413                                   | 192747         |
|                                          |                | 207159                                   | 243694         |
|                                          |                | 150053                                   | 140633         |
|                                          |                | 129490                                   | 135455         |

Area measurements (made in Adobe Photoshop) of the HNK-1-positive migratory neural crest cell domain in at least 5 serial sections are presented. CL, contralateral side of the section.

**Supplementary Table 5. Measurements of the fluorescence intensity per area for Cadherin-7 upon  $\alpha$ N-catenin knock-down or overexpression.**

| $\alpha$ N-catenin MO<br><u>positive cells</u> | $\alpha$ N-catenin MO<br><u>negative cells</u> | pCIG- $\alpha$ N-catenin<br><u>positive cells</u> | pCIG- $\alpha$ N-catenin<br><u>negative cells</u> |
|------------------------------------------------|------------------------------------------------|---------------------------------------------------|---------------------------------------------------|
| 0.0335                                         | 0.0249                                         | 0.0415                                            | 0.0156                                            |
| 0.0284                                         | 0.0251                                         | 0.0178                                            | 0.0123                                            |
| 0.0184                                         | 0.0199                                         | 0.0142                                            | 0.0138                                            |
| 0.00955                                        | 0.0341                                         | 0.00995                                           | 0.0104                                            |
| 0.0208                                         | 0.042                                          | 0.0373                                            | 0.0169                                            |
| 0.0221                                         | 0.108                                          | 0.0235                                            | 0.0168                                            |
| 0.0115                                         | 0.0368                                         | 0.0312                                            | 0.0289                                            |
| 0.0239                                         | 0.0793                                         | 0.0214                                            | 0.0262                                            |
| 0.00695                                        | 0.0272                                         | 0.0201                                            | 0.0281                                            |
| 0.00623                                        | 0.0397                                         | 0.0192                                            | 0.0181                                            |
| 0.0145                                         | 0.0345                                         | 0.0319                                            | 0.0179                                            |
| 0.0179                                         | 0.0176                                         | 0.013                                             | 0.0157                                            |
| 0.0228                                         | 0.0273                                         | 0.0151                                            | 0.0164                                            |
| 0.0178                                         | 0.0171                                         | 0.011                                             | 0.0104                                            |
| 0.0171                                         | 0.0314                                         | 0.026                                             | 0.0144                                            |
| 0.0231                                         | 0.0399                                         | 0.0247                                            | 0.0136                                            |
| 0.0067                                         | 0.0531                                         | 0.0265                                            | 0.0265                                            |
| 0.00916                                        | 0.0542                                         | 0.0293                                            | 0.0326                                            |
| 0.0128                                         | 0.0566                                         | 0.0298                                            | 0.0208                                            |
| 0.00751                                        | 0.0607                                         | 0.035                                             | 0.0201                                            |
| 0.0246                                         | 0.124                                          | 0.0226                                            | 0.0184                                            |
| 0.00996                                        | 0.0482                                         | 0.0116                                            | 0.016                                             |
| 0.0201                                         | 0.031                                          | 0.0233                                            | 0.0286                                            |
| 0.013                                          | 0.0349                                         | 0.0332                                            | 0.0196                                            |
| 0.0141                                         | 0.0407                                         | 0.0174                                            | 0.0169                                            |
| 0.0112                                         | 0.0312                                         | 0.0296                                            | 0.021                                             |
| 0.0914                                         | 0.031                                          |                                                   |                                                   |
| 0.032                                          | 0.0424                                         |                                                   |                                                   |
| 0.018                                          | 0.0347                                         |                                                   |                                                   |
| 0.0109                                         | 0.0303                                         |                                                   |                                                   |

Fluorescence intensity and area measurements (made in the Zeiss Axiovision Release 4.8 software) of Cadherin-7 in MO (or GFP)-positive and -negative cells from at least 4 serial sections in three embryos are presented.

Supplemental Figure 1

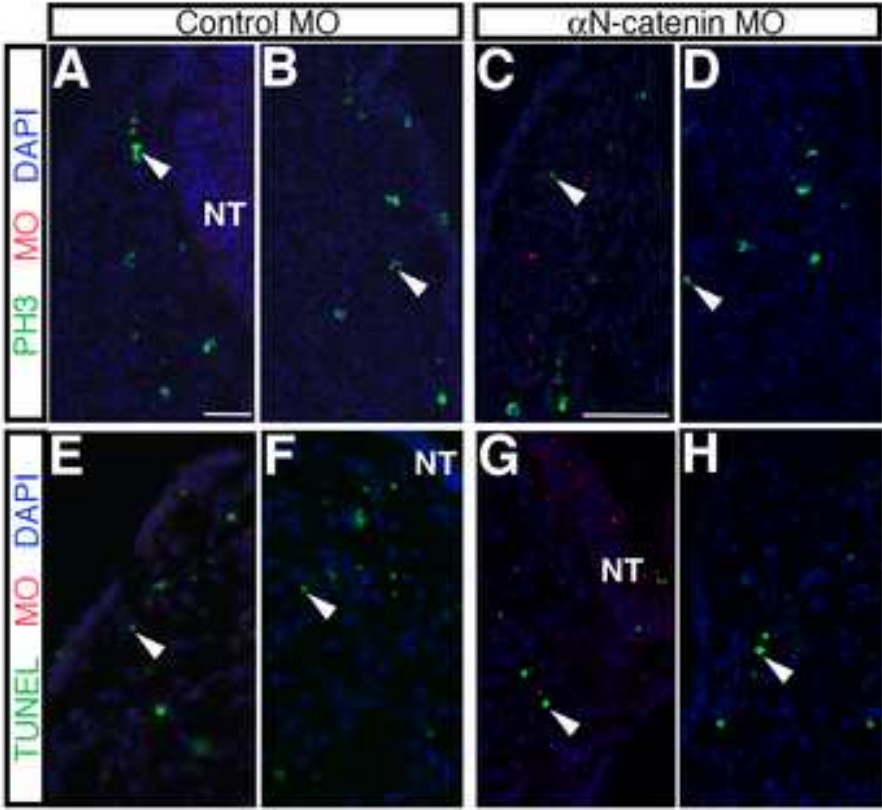

**Supplemental Figure 1. Electroporation of  $\alpha$ N-catenin or the control MO does not alter cell proliferation nor cell death in the developing trigeminal ganglion.** Electroporation of control (A,B,E,F) or  $\alpha$ N-catenin (C,D,G,H) MO, followed by re-incubation of embryos to HH15 (A-D), HH14 (E,F) or HH16 (G,H), transverse sectioning, and processing for phospho-histone H3 immunohistochemistry (A-D, PH3, green) or TUNEL (E-H, green) (representative sections are shown). MO-treated (A,C,E,G) and contralateral (B,D,F,H) sides of sections are shown. Arrowheads indicate PH3- (A-D) or TUNEL-positive (E-H) nuclei, with a similar distribution in the presence of either MO (red) or with that found on the contralateral control side of the section. Asterisk marks the MO-electroporated neural tube. DAPI (blue) labels cell nuclei in all images. Scale bar in (A) is 50  $\mu$ m. Scale bar in (C) is also 50  $\mu$ m and applicable to remaining images.

Supplemental Figure 2

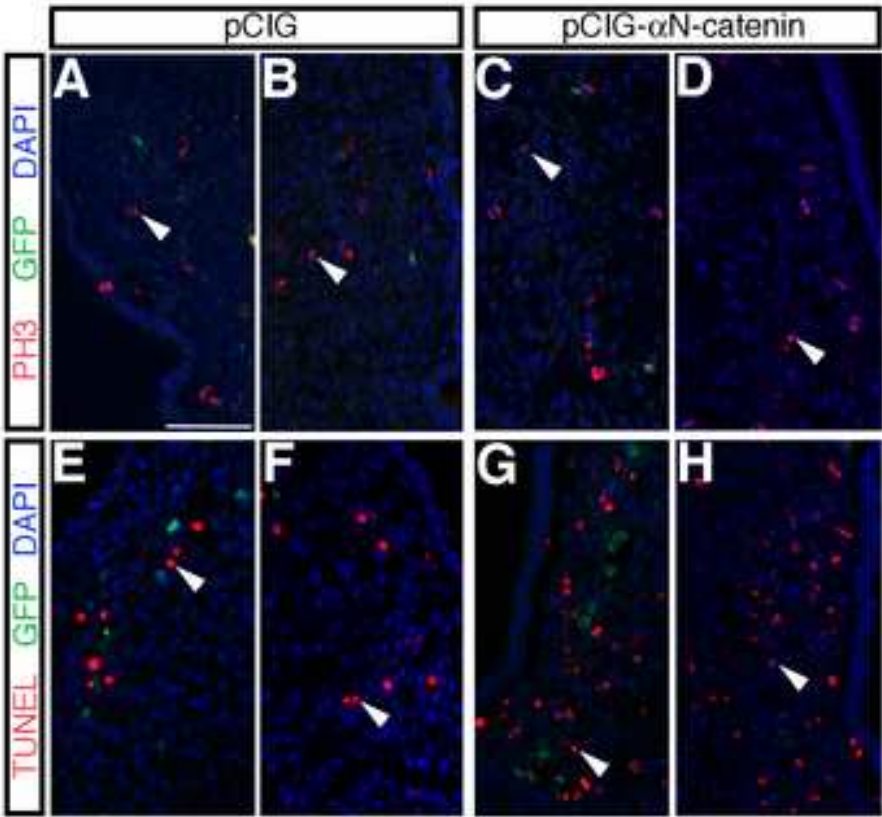

**Supplemental Figure 2. Overexpression of  $\alpha$ N-catenin or the pCIG control construct does not alter cell death nor cell proliferation in the chick embryonic neural tube.** Electroporation of control pCIG (A,B,E,F) or pCIG- $\alpha$ N-catenin (C,D,G,H) constructs, followed by re-incubation of embryos to HH14 (A-D), HH15 (E,F) or HH16 (G,H), transverse sectioning, and processing for phospho-histone H3 immunohistochemistry (A-D, PH3, red) or TUNEL (E-H, red) (representative sections are shown). Electroporated (A,C,E,G) and contralateral (B,D,F,H) sides of sections are shown. Arrowheads indicate PH3- (A-D) or TUNEL-positive (E-H) nuclei, with a similar distribution in the presence of either construct (GFP, green) or with that found on the contralateral control side of the section. DAPI (blue) labels cell nuclei in all images. Scale bar in (A) is 50  $\mu$ m. Scale bar in (C) is also 50  $\mu$ m and applicable to remaining images.
